# Supplementary material for: Structure-Based Evaluation of Hybrid Lipid–Polymer Nanoparticles: The Role of the Polymeric Guest
Source: MDPI journal article supplement (doi:10.3390/polym16020290), 2024-01-20
Supplement: s1 [file s1]

## SUPPLEMENTARY MATERIAL

### Structure-based evaluation of hybrid lipid-polymer nanoparticles: the role of the polymeric guest

Maria Chountoulesi, Natassa Pippa, Aleksander Forys, Barbara Trzebicka and Stergios Pispas

a.

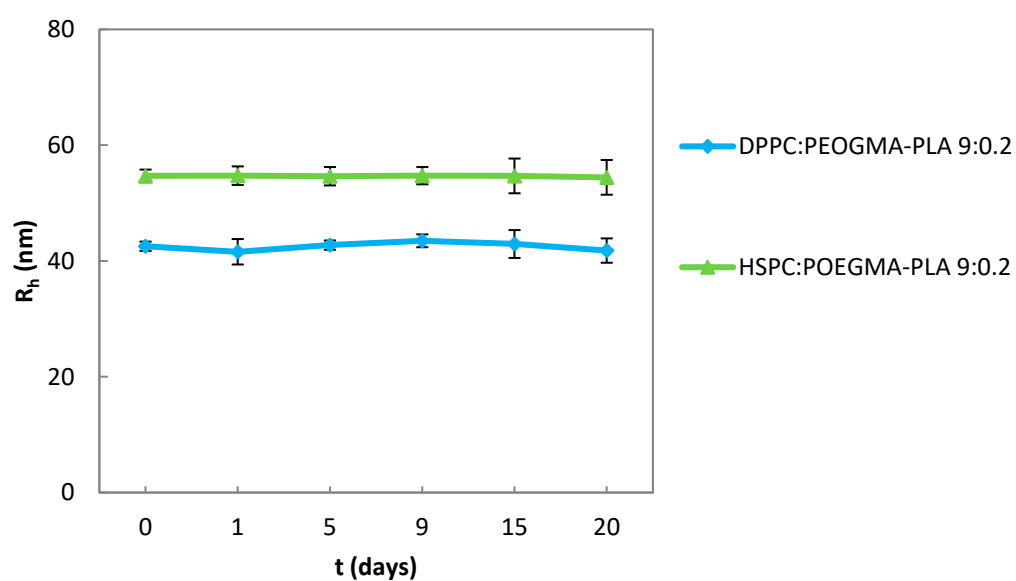

b.

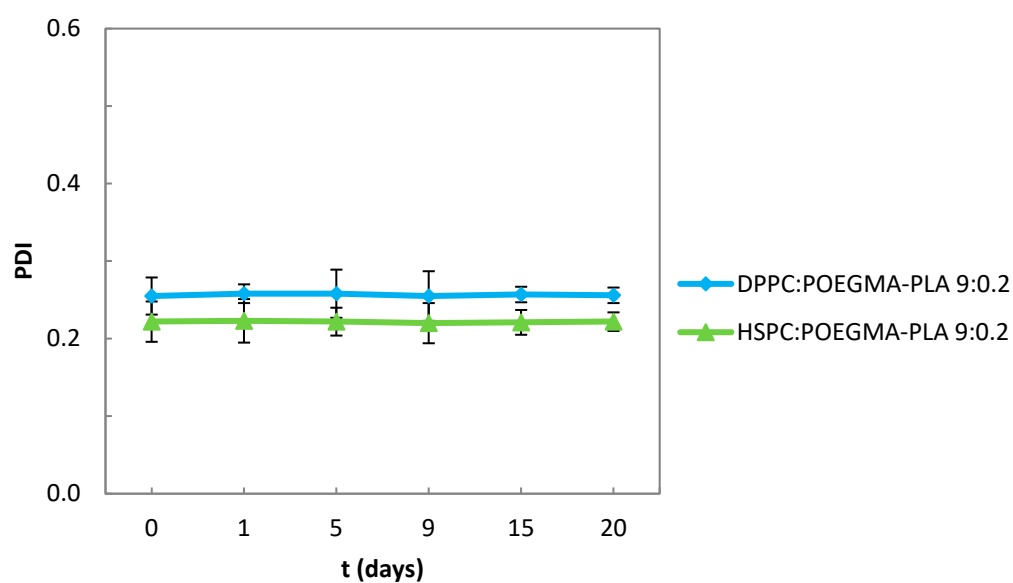

**Figure S1:** Stability studies over time of **a.**  $R_h$  (nm) and **b.** PDI of lipid:POEGMA-PLA systems.

**a.**

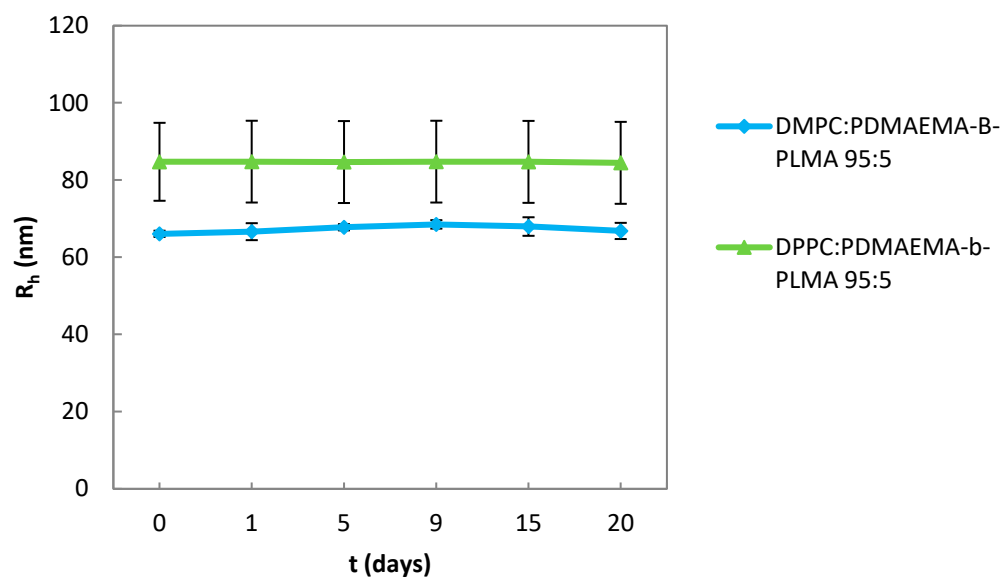

**b.**

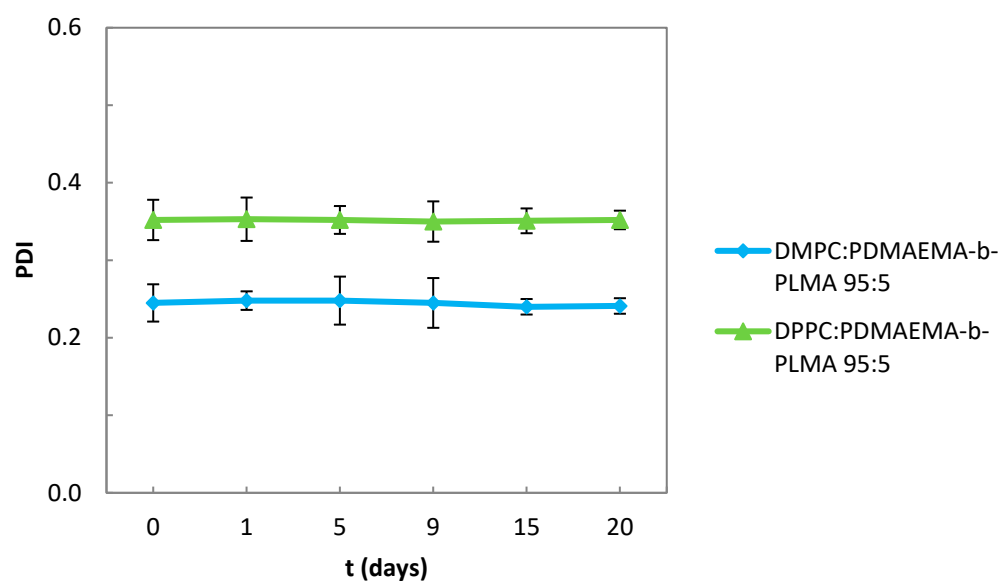

**Figure S2:** Stability studies over time of **a.**  $R_h$  (nm) and **b.** PDI of lipid:PDMAEMA-b-PLMA systems.

**a.**

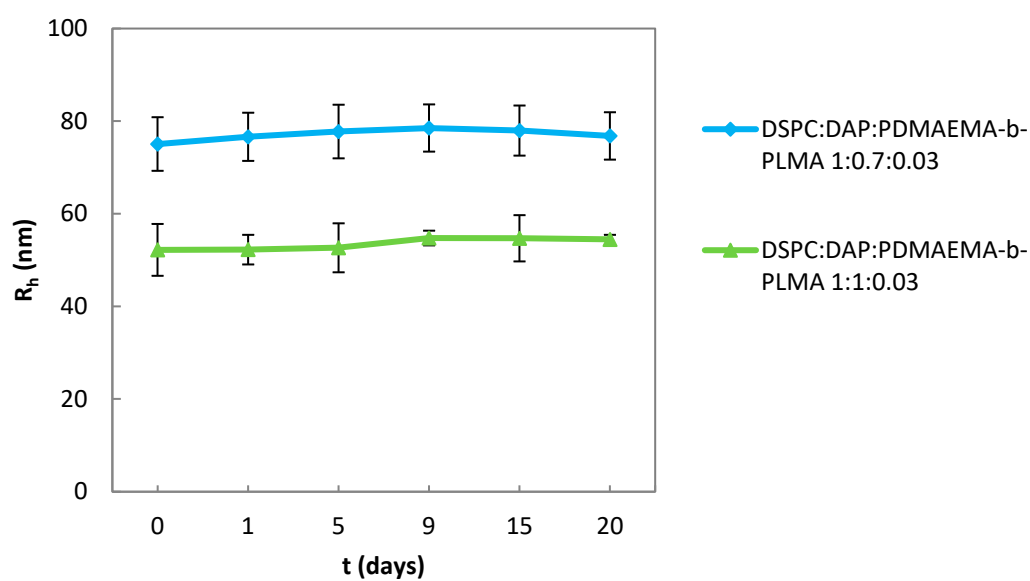

**b.**

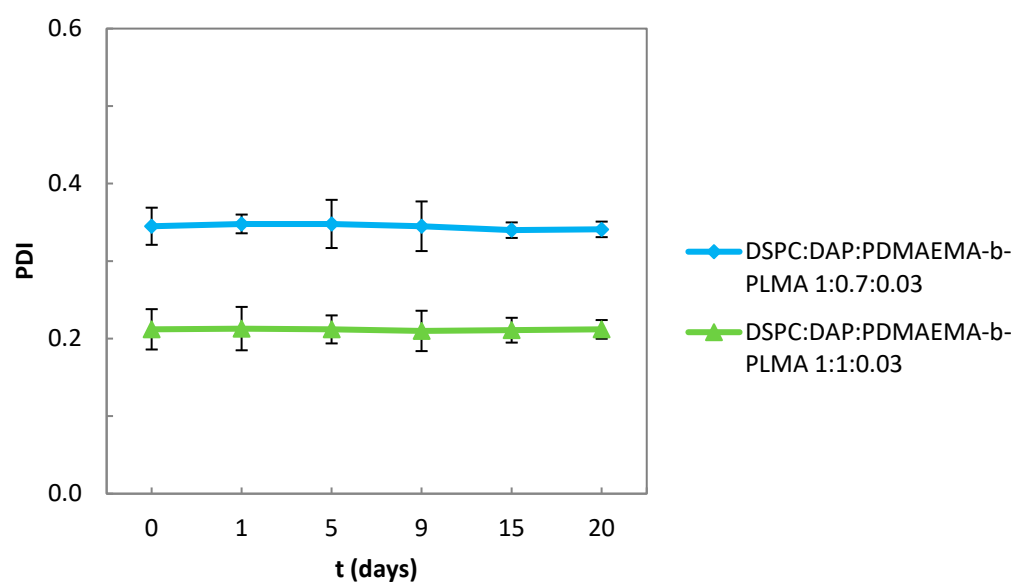

**Figure S3:** Stability studies over time of **a.**  $R_h$  (nm) and **b.** PDI of DSPC:DAP:PDMAEMA-b-PLMA systems.

a.

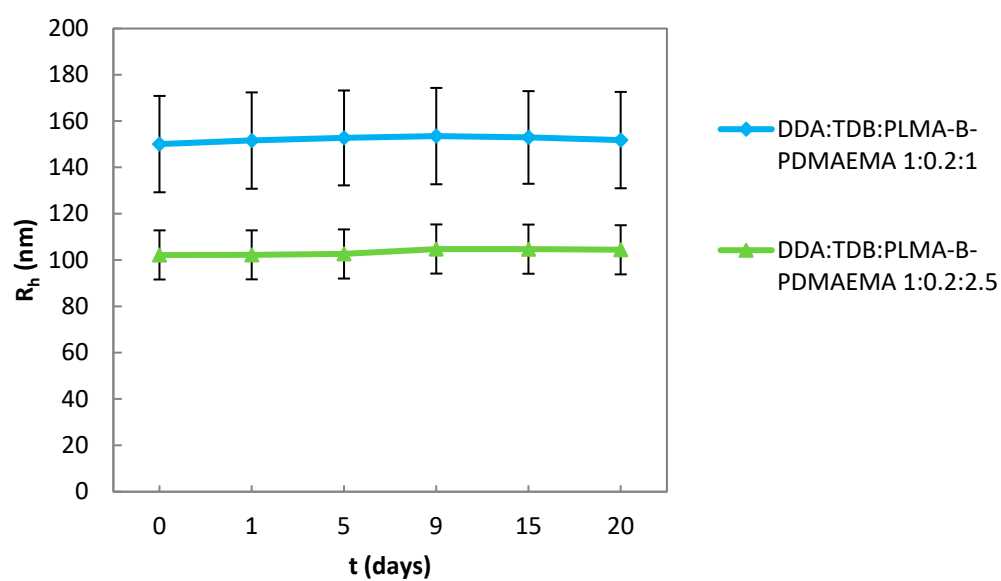

b.

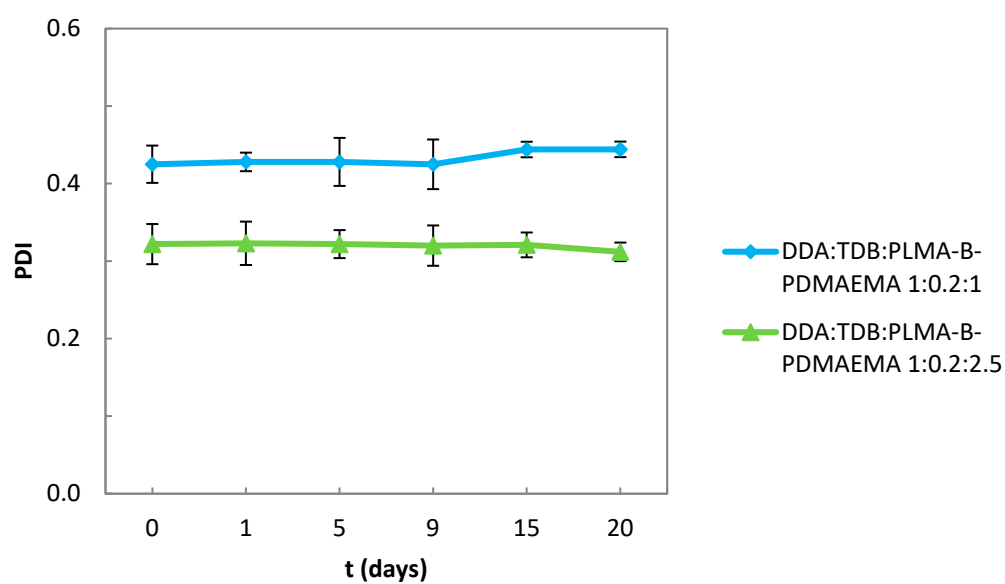

**Figure S4:** Stability studies over time of **a.**  $R_h$  (nm) and **b.** PDI of DDA:TDB:PDMAEMA-b-PLMA systems.
